# Supplementary material for: Hole transfer dynamics between CsPbBr 3 PNCs and p -phenylene diisothiocyanate
Source: Royal Society of Chemistry journal article supplement (doi:10.1039/d5cp03199k), 2026-01-01
Supplement: d5cp03199k1.pdf [file d5cp03199k1.pdf]

## Supporting Information

### Hole transfer dynamics between CsPbBr<sub>3</sub> PNC and *p*-phenylene diisothiocyanate

Sourav Mandal<sup>a</sup>, Subhadip Giri<sup>a</sup>, Suraj Barman<sup>a</sup>, Sourav Nandi<sup>a</sup>, Shashanka Shekhar Samanta<sup>a</sup>, Sayan Pradhan<sup>b</sup>, Ayon Jyoti Karmakar<sup>b</sup>, Prasanta Kumar Dutta<sup>b</sup> and Ajay Misra<sup>\*a</sup>

<sup>a</sup>Department of Chemistry, Vidyasagar University, West Bengal 721102, India

<sup>b</sup>Department of Physics, Indian Institute of Technology, Kharagpur -721302, India

Email: [ajay@mail.vidyasagar.ac.in](mailto:ajay@mail.vidyasagar.ac.in)

| Content                                                                                                                                      | Page No. |
|----------------------------------------------------------------------------------------------------------------------------------------------|----------|
| Quantum Yield Measurement.                                                                                                                   | S3       |
| Time-Resolved Photoluminescence.                                                                                                             | S4       |
| <b>Fig S1:</b> HRTEM images (a,b) and SAED patterns(c) of CsPbBr <sub>3</sub> NC with scale bar of 10nm (a) 20 nm (b) respectively           | S4       |
| <b>Fig S2:</b> TEM size distribution curve                                                                                                   | S4       |
| <b>Fig S3:</b> Tauc plot                                                                                                                     | S5       |
| <b>Fig S4:</b> Fluorescence spectra of PNCs solution after dilution with Toluene solvent.                                                    | S5       |
| <b>Fig S5:</b> Figure S4. DFT optimized geometry and HOMO-LUMO gap of PDNCS using TPSS/CCPVDZ level of theory.                               | S6       |
| <b>Fig S6:</b> 2D pseudo-colour TA plot of (a) CsPbBr <sub>3</sub> NCs and (b ) CsPbBr <sub>3</sub> -PDNCS system at 440 nm pump excitation. | S6       |
| <b>Fig S7:</b> Plots of PLQY vs $\lambda_{ex}$ for a given concentration                                                                     | S8       |
| <b>Table S1:</b> Quenching efficiency                                                                                                        | S9       |
| <b>Table S2:</b> Photoinduced hole transfer parameters                                                                                       | S9       |
| <b>Table S3:</b> Different values of PLQY as a function of $\lambda_{ex}$ and [PDNCS] for PNC.                                               | S10      |
| <b>Table S4:</b> PLQY without PDNCS and with PDNCS (29 $\mu$ M)                                                                              | S11      |
| <b>References.</b>                                                                                                                           | S11      |

### Photo Luminescence Quantum Yield (PLQY) Measurement.

The PLQY of PNCs were measured using Coumarin 153 (C153) as reference standard (absolute QY 58% in ethanol). Samples for PLQY measurements were prepared by diluting the colloidal dispersion of PNCs with anhydrous toluene keeping the optical density of both the C153 and the PNCs below 0.1 at 420 nm. The absorption and PL emission spectra were measured using the instruments mentioned in the manuscript. PLQY at various excitation wavelength and concentration of PDNCS were calculated using the following equation.

$$PLQY = Q_R \times \frac{OD_R}{OD} \times \frac{I}{I_R} \times \frac{\eta^2}{\eta_R^2}$$

where PLQY, OD, I and  $\eta$  represents photo luminescence quantum yield, optical density, integrated intensity, and refractive index of the medium respectively. Subscript "R" refers to the reference (here C153).

### Time-Resolved Photoluminescence.

PL lifetime analyses were conducted at room temperature using a HORIBA Delta Flex fluorescence lifetime measurement setup spectrometer using a 372 nm pulsed laser diode excitation. The PL decay curve of PNCs in absence and presence of PDNCS is shown in Figure 3 and were well-fitted using the following bi-exponential fitting equation.

$$I(t) = A_1 \exp\left(\frac{-t}{\tau_1}\right) + A_2 \exp\left(\frac{-t}{\tau_2}\right) + C$$

Average PL lifetime ( $\tau_{avg}$ ) was calculated using the following equation.

$$\tau_{avg} = \frac{\alpha_1 \tau_1^2 + \alpha_2 \tau_2^2}{\alpha_1 \tau_1 + \alpha_2 \tau_2}$$

where  $\alpha$ , and  $\tau$  are the pre-exponential factor and PL lifetime of each component respectively.

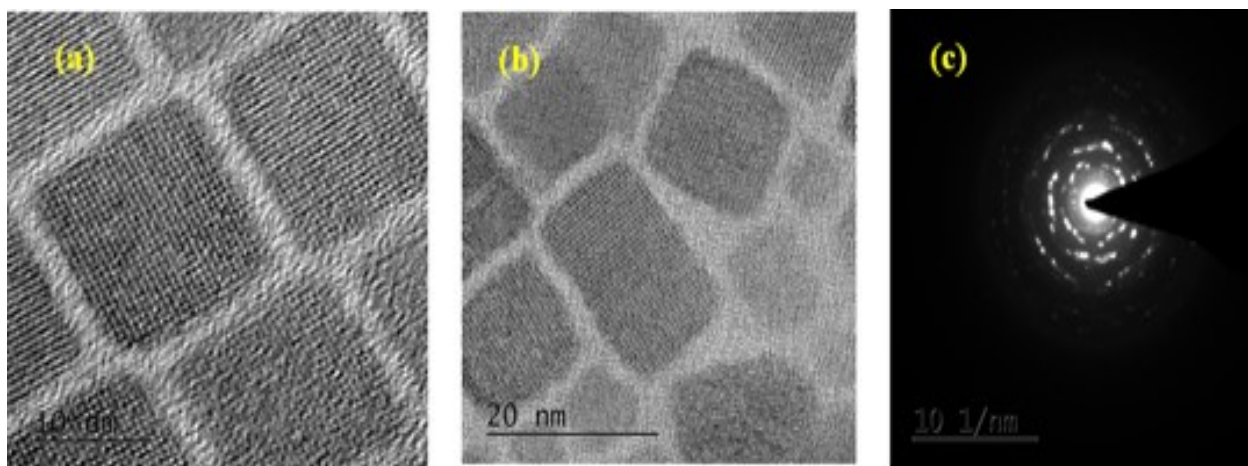

**Fig S1:** HRTEM images (a,b) and SAED patterns(c) of  $\text{CsPbBr}_3$  NC with scale bar of 10nm (a) 20 nm (b) respectively

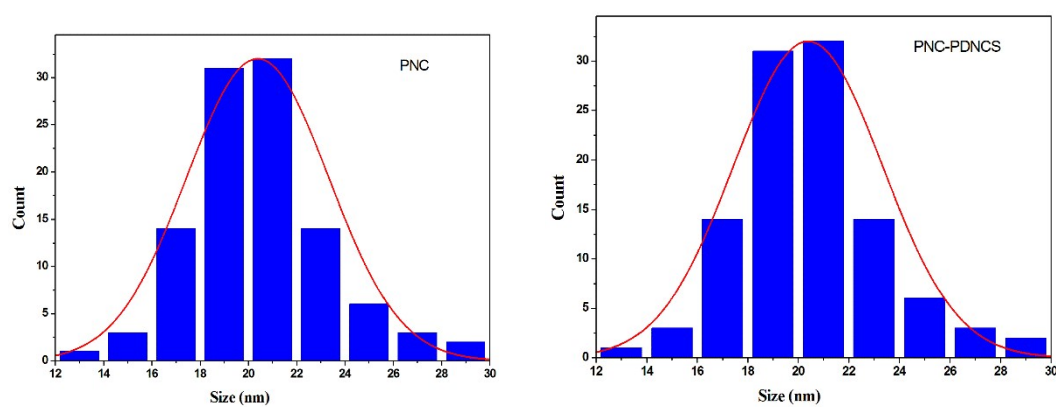

**Fig S2:** Bar diagram of the average size distribution of  $\text{CsPbBr}_3$  nano crystals obtained in the TEM study.

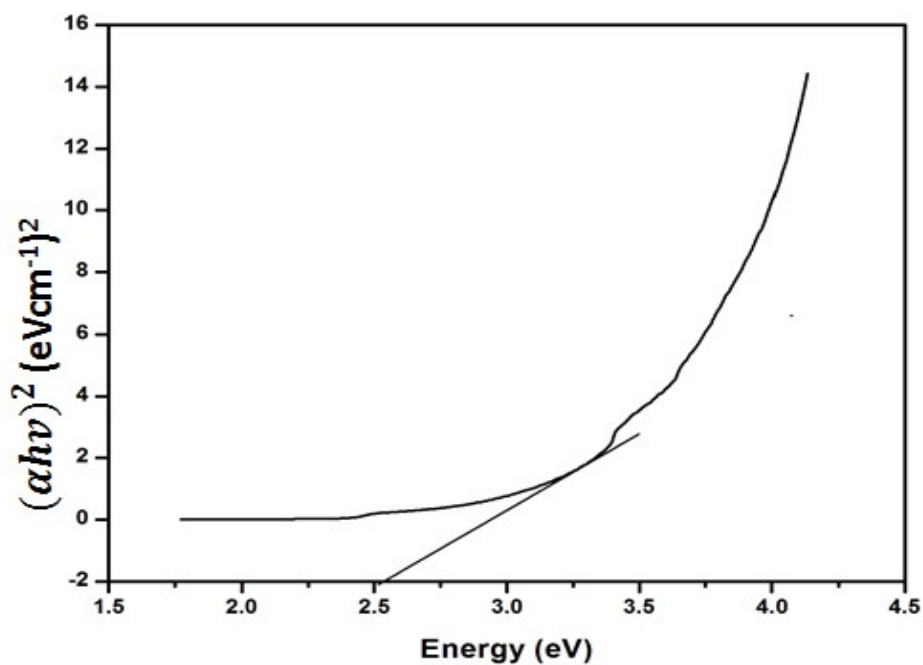

**Fig S3:** Tauc plot to calculate the band gap of the CsPbBr<sub>3</sub> PNC.

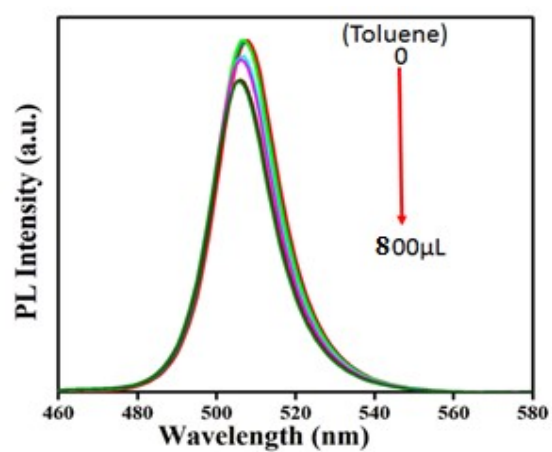

**Fig S4:** Photo luminescence spectra of CsPbBr<sub>3</sub> nanocrystals solution in toluene with addition of excess amount of solvent (toluene) corresponding up to the maximum volume of PDNCS added during the present study.

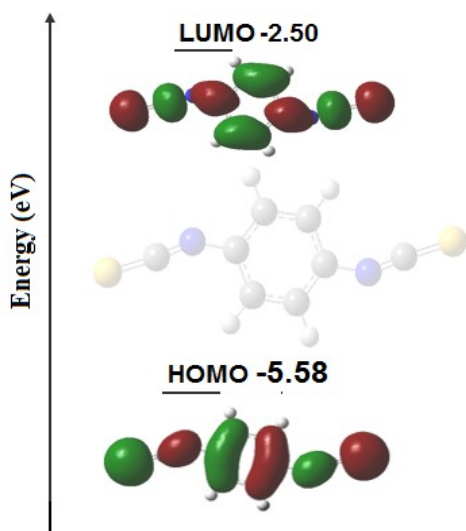

**Fig S5:** DFT optimized geometry and HOMO-LUMO gap of PDNCS using TPSS/STPSS/CCPVDZ level of theory.

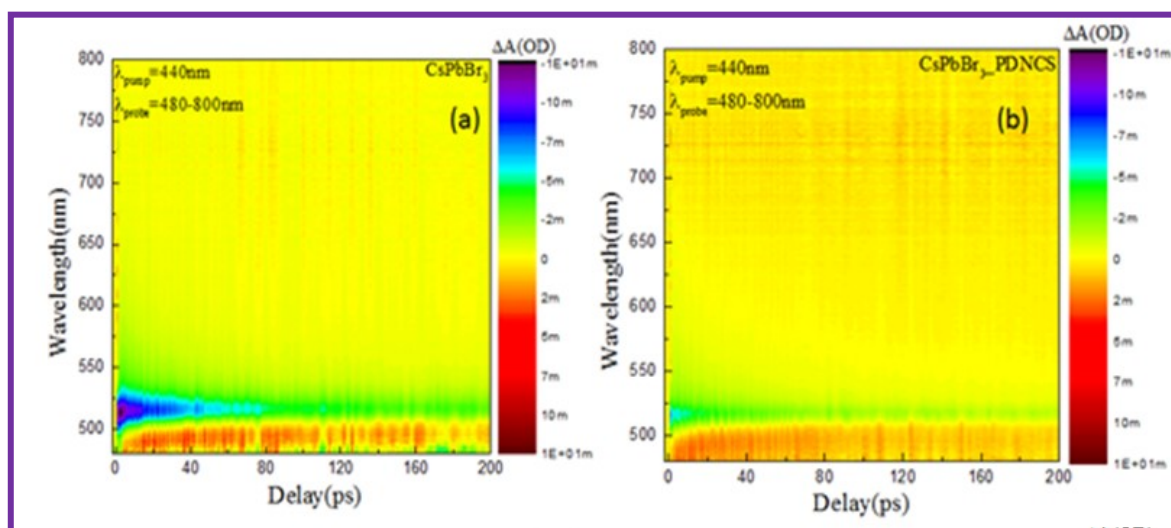

**Fig S6:** 2D pseudo-colour TA plot of (a ) CsPbBr<sub>3</sub> PNCs and (b ) CsPbBr<sub>3</sub>-PDNCS system at 440 nm pump excitation

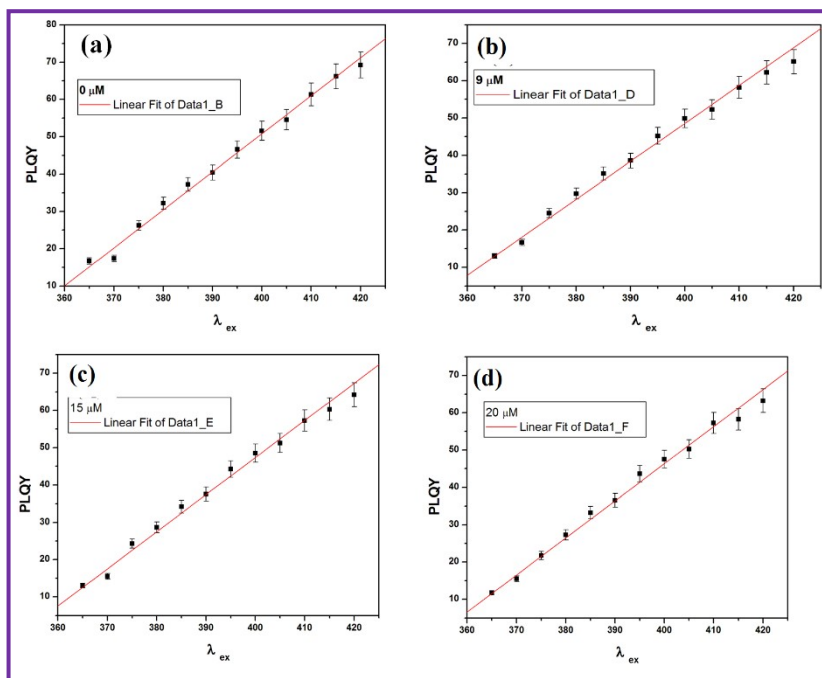

**Fig S7:** Plots of PLQY vs  $\lambda_{ex}$  (nm) for a given concentration (a) 0mM, (b) 5mM, (c) 9 mM, (d) 15mM, (e) 20 mM, (f) 25mM

**Table S1:** PLQY (%) CsPbBr<sub>3</sub> PNC in presence various concentration of PDNCS ( $\lambda_{ex} = 420\text{nm}$  and  $\lambda_{em} = 509\text{ nm}$ )

| PDNCS<br>(mM) | Quenching<br>Efficiency<br>(%) |
|---------------|--------------------------------|
| 0.14          | 15.80                          |
| 0.28          | 21.95                          |
| 0.42          | 35.18                          |
| 0.56          | 50.18                          |
| 0.70          | 59.94                          |
| 0.84          | 69.62                          |
| 0.98          | 75.09                          |
| 1.11          | 81.81                          |
| 1.24          | 85.80                          |
| 1.34          | 89.06                          |

**Table S2:** Stern-Volmer quenching constant ( $K_{sv}$ ), average PL lifetime ( $\tau_{avs}$ ), PL quenching constant ( $K_q$ ) and hole transfer constant ( $K_{ht}$ ) of CsPbBr<sub>3</sub> PNC in presence of quencher, PDNCS.

| Sample              | $K_{sv}(\text{mM}^{-1})$ | $\tau_{avs}(\text{ns})$ | $K_q (\text{M}^{-1}\text{ns}^{-1})$ | Hole transfer constant ( $K_{ht}$ ) ( $\text{s}^{-1}$ ) |
|---------------------|--------------------------|-------------------------|-------------------------------------|---------------------------------------------------------|
| CsPbBr <sub>3</sub> | 2.84                     | 6.67                    | 425.78                              | $31.5 \times 10^7$                                      |

**Table S3:** Calculated PLQY as a function of  $\lambda_{ex}$  and [PDNCS] for CsPbBr<sub>3</sub> PNC.

| (a)           |                        |        | (b)           |                        |        | (c)           |                        |        |
|---------------|------------------------|--------|---------------|------------------------|--------|---------------|------------------------|--------|
| [PDNCS]<br>mM | $\lambda_{ex}$<br>(nm) | PLQY   | [PDNCS]<br>mM | $\lambda_{ex}$<br>(nm) | PLQY   | [PDNCS]<br>mM | $\lambda_{ex}$<br>(nm) | PLQY   |
| 0             | 365                    | 16.675 | 5             | 365                    | 14.301 | 9             | 365                    | 13.071 |
|               | 370                    | 17.39  |               | 370                    | 17.02  |               | 370                    | 16.652 |
|               | 375                    | 26.269 |               | 375                    | 25.133 |               | 375                    | 24.547 |
|               | 380                    | 32.2   |               | 380                    | 31.365 |               | 380                    | 29.773 |
|               | 385                    | 37.256 |               | 385                    | 35.265 |               | 385                    | 35.2   |
|               | 390                    | 40.45  |               | 390                    | 39.48  |               | 390                    | 38.569 |
|               | 395                    | 46.562 |               | 395                    | 45.521 |               | 395                    | 45.2   |
|               | 400                    | 51.587 |               | 400                    | 50.205 |               | 400                    | 49.865 |
|               | 405                    | 54.562 |               | 405                    | 53.265 |               | 405                    | 52.25  |
|               | 410                    | 61.325 |               | 410                    | 60.25  |               | 410                    | 62.211 |
|               | 415                    | 66.211 |               | 415                    | 65.002 |               | 415                    | 58.202 |
|               | 420                    | 69.232 |               | 420                    | 68.786 |               | 420                    | 65.106 |
| (d)           |                        |        | (e)           |                        |        | (f)           |                        |        |

| [PDNCS]<br>mM | $\lambda_{ex}$<br>(nm) | PLQY   | [PDNCS]<br>mM | $\lambda_{ex}$<br>(nm) | PLQY   | [PDNCS]<br>mM | $\lambda_{ex}$<br>(nm) | PLQY   |
|---------------|------------------------|--------|---------------|------------------------|--------|---------------|------------------------|--------|
| (d)<br><br>15 | 365                    | 13.04  | 20            | 365                    | 11.728 | 25            | 365                    | 9.851  |
|               | 370                    | 15.523 |               | 370                    | 15.5   |               | 370                    | 15.26  |
|               | 375                    | 24.307 |               | 375                    | 21.771 |               | 375                    | 19.725 |
|               | 380                    | 28.665 |               | 380                    | 27.3   |               | 380                    | 26.658 |
|               | 385                    | 34.23  |               | 385                    | 33.265 |               | 385                    | 32.25  |
|               | 390                    | 37.547 |               | 390                    | 36.524 |               | 390                    | 35.302 |
|               | 395                    | 44.265 |               | 395                    | 43.65  |               | 395                    | 42.15  |
|               | 400                    | 48.56  |               | 400                    | 47.554 |               | 400                    | 46.522 |
|               | 405                    | 51.23  |               | 405                    | 50.258 |               | 405                    | 48.44  |
|               | 410                    | 57.266 |               | 410                    | 57.254 |               | 410                    | 55.1   |
|               | 415                    | 60.315 |               | 415                    | 58.214 |               | 415                    | 57.395 |
|               | 420                    | 64.222 |               | 420                    | 63.225 |               | 420                    | 61.428 |

**Table S4:** PLQY without PDNCS and with PDNCS (29mM)

| $\lambda_{ex}$<br>(nm) | PLQY<br>(0<br>mM) | PLQY<br>(29mM) | Percentage<br>decrease of<br>PLQY in<br>presence of<br>PDNCS |
|------------------------|-------------------|----------------|--------------------------------------------------------------|
| 365                    | 16.6              | 8.3            | 50                                                           |
| 370                    | 17.3              | 13.9           | 20                                                           |
| 375                    | 26.2              | 17.3           | 33.7                                                         |
| 380                    | 32.2              | 25.5           | 20.6                                                         |
| 385                    | 37.2              | 31.1           | 16.3                                                         |
| 390                    | 40.4              | 35             | 13.3                                                         |
| 395                    | 46.5              | 41.5           | 10.8                                                         |
| 400                    | 51.5              | 45.5           | 11.6                                                         |
| 405                    | 54.5              | 47.9           | 12                                                           |
| 410                    | 61.3              | 52.1           | 14.9                                                         |
| 415                    | 66.2              | 55.2           | 16.5                                                         |
| 420                    | 69.2              | 58.3           | 15.6                                                         |

## References.

(1) Mandal, S., Mukherjee, S., De, C. K., Roy, D., Ghosh, S., & Mandal, P. K. (2020). Extent of shallow/deep trap states beyond the conduction band minimum in defect-tolerant CsPbBr<sub>3</sub> perovskite quantum dot: control over the degree of charge carrier recombination. *The Journal of Physical Chemistry Letters*, 11(5), 1702-1707.

- (2) Abiodun, S. L., Pellechia, P. J., & Greytak, A. B. (2021). Effective purification of CsPbBr<sub>3</sub> nanocrystals with high quantum yield and high colloidal stability via gel permeation chromatography. *The Journal of Physical Chemistry C*, 125(6), 3463-3471.
- (3) Venkateswarlu, D., Swetha, T., Akhil, S., Palabathuni, M., Mishra, N., & Singh, S. P. (2023). Surface engineering of CsPbBr<sub>3</sub> perovskite nanocrystals: hole transfer dynamics and enhanced photocurrent response using a novel organic molecule. *Materials Advances*, 4(8), 1935-1940.
- (4) Dhanabalan, B., Castelli, A., Palei, M., Spirito, D., Manna, L., Krahne, R., & Arciniegas, M. (2019). Simple fabrication of layered halide perovskite platelets and enhanced photoluminescence from mechanically exfoliated flakes. *Nanoscale*, 11(17), 8334-8342.
